# Supplementary material for: Comprehensive genomic analysis of hypocholesterolemic probiotic Enterococcus faecium LR13 reveals unique proteins involved in cholesterol-assimilation
Source: Front Nutr. 2023 Apr 4;10:1082566. doi: 10.3389/fnut.2023.1082566 (PMC10110904; doi:10.3389/fnut.2023.1082566)
Supplement: Supplementary File 1 — Table S1: BLAST analysis of pair-end reads of E. faecium LR13. Table S2: After trimmomatic analysis the reads left for further analysis. Table S3: Reads after merge of overlapping reads. Table S4: N50, GC%, and NG50 value when aligned with the reference E. faecium genome. Table S5: Completeness of assembly. Table S6: cgMLST output. [file Data_Sheet_1.xlsx]

## Sheet: S1 BLAST Analysis of Reads
Reads	Total no. of reads	Hits with Bacteria	Hits with Virus	Hits with Eukaryote	Hits with E.faecium
LR13_HHH23DSXX_L3_1.fq	8994262	8658871	18136	21588	8539301
LR13_HHH23DSXX_L3_2.fq	8994262	8625696	17969	21000	8505441

## Sheet: S2 Trimming of Reads
Reads	Total no. of reads	Trimmed pair-end Reads	Low-quality single-end reads
LR13_HHH23DSXX_L3_1.fq	8994262	8878090 (98.71%)	85038 (0.95%)
LR13_HHH23DSXX_L3_2.fq	8994262	8878090 (98.71%)	24031 (0.27%)

## Sheet: S3 Overlapping Reads Merge 
Reads	Total no. of reads	Flash Merged single-end reads	Unmerged pair-end reads
LR13_HHH23DSXX_L3_1.fq	8878090	1648185	7229905
LR13_HHH23DSXX_L3_2.fq	8878090		7229905

## Sheet: S4 QUAST Assembly QC
Total no. of contigs	Total length	Largest contig	N50	GC (%)	Size of genome
97	2665715	282801	123181	37.79	2.66Mbp

## Sheet: S5 CheckM Assembly QC
Bin ID	Marker lineage	genomes	markers	marker sets	0	1	2	3	4	5+	Completeness	Contamination	Strain heterogeneity
LR13	o_Lactobacillales (UID544)	293	475	267	1	455	14	2	2	1	99.63	7.4	4.76

## Sheet: S6 cgMLST Summary stats
Locus	Isolate frequency	Isolate percentage	Core
adk	13	100	Y
atpA	13	100	Y
BACT000001 (rpsA)	13	100	Y
BACT000002 (rpsB)	13	100	Y
BACT000003 (rpsC)	13	100	Y
BACT000004 (rpsD)	13	100	Y
BACT000005 (rpsE)	13	100	Y
BACT000006 (rpsF)	13	100	Y
BACT000007 (rpsG)	13	100	Y
BACT000008 (rpsH)	13	100	Y
BACT000009 (rpsI)	13	100	Y
BACT000010 (rpsJ)	13	100	Y
BACT000011 (rpsK)	13	100	Y
BACT000012 (rpsL)	13	100	Y
BACT000013 (rpsM)	13	100	Y
BACT000014 (rpsN)	13	100	Y
BACT000015 (rpsO)	13	100	Y
BACT000016 (rpsP)	13	100	Y
BACT000017 (rpsQ)	13	100	Y
BACT000018 (rpsR)	13	100	Y
BACT000019 (rpsS)	13	100	Y
BACT000020 (rpsT)	13	100	Y
BACT000021 (rpsU)	13	100	Y
BACT000030 (rplA)	13	100	Y
BACT000031 (rplB)	13	100	Y
BACT000032 (rplC)	13	100	Y
BACT000033 (rplD)	13	100	Y
BACT000034 (rplE)	13	100	Y
BACT000035 (rplF)	13	100	Y
BACT000036 (rplL)	13	100	Y
BACT000038 (rplI)	13	100	Y
BACT000039 (rplJ)	13	100	Y
BACT000040 (rplK)	13	100	Y
BACT000042 (rplM)	13	100	Y
BACT000043 (rplN)	13	100	Y
BACT000044 (rplO)	13	100	Y
BACT000045 (rplP)	13	100	Y
BACT000046 (rplQ)	13	100	Y
BACT000047 (rplR)	13	100	Y
BACT000048 (rplS)	13	100	Y
BACT000049 (rplT)	13	100	Y
BACT000050 (rplU)	13	100	Y
BACT000051 (rplV)	13	100	Y
BACT000052 (rplW)	13	100	Y
BACT000053 (rplX)	13	100	Y
BACT000056 (rpmA)	13	100	Y
BACT000057 (rpmB)	13	100	Y
BACT000058 (rpmC)	13	100	Y
BACT000059 (rpmD)	13	100	Y
BACT000060 (rpmE)	13	100	Y
BACT000061 (rpmF)	13	100	Y
BACT000062 (rpmG)	13	100	Y
BACT000063 (rpmH)	13	100	Y
BACT000064 (rpmI)	13	100	Y
BACT000065 (rpmJ)	13	100	Y
ddl	13	100	Y
ENFM0001 (dnaA)	13	100	Y
ENFM0002 (dnaN)	13	100	Y
ENFM0003 (yaaA)	13	100	Y
ENFM0004 (recF)	13	100	Y
ENFM0005 (gyrB)	13	100	Y
ENFM0006 (gyrA)	13	100	Y
ENFM0007	13	100	Y
ENFM0008 (ssb)	13	100	Y
ENFM0009	13	100	Y
ENFM0010	13	100	Y
ENFM0011 (rplI)	13	100	Y
ENFM0012 (dnaB)	13	100	Y
ENFM0013	13	100	Y
ENFM0014	13	100	Y
ENFM0015	13	100	Y
ENFM0016	13	100	Y
ENFM0017 (spxB)	13	100	Y
ENFM0018	13	100	Y
ENFM0019	13	100	Y
ENFM0020	13	100	Y
ENFM0021	13	100	Y
ENFM0022	13	100	Y
ENFM0023	13	100	Y
ENFM0024	11	84.6	-
ENFM0025	10	76.9	-
ENFM0026	10	76.9	-
ENFM0027	10	76.9	-
ENFM0028	10	76.9	-
ENFM0029	10	76.9	-
ENFM0030 (lacG)	10	76.9	-
ENFM0031	10	76.9	-
ENFM0032	10	76.9	-
ENFM0033	10	76.9	-
ENFM0034 (guaA)	13	100	Y
ENFM0035	13	100	Y
ENFM0036	13	100	Y
ENFM0037	13	100	Y
ENFM0038	13	100	Y
ENFM0039 (deoC)	13	100	Y
ENFM0040	13	100	Y
ENFM0041	13	100	Y
ENFM0042	13	100	Y
ENFM0043	13	100	Y
ENFM0044	13	100	Y
ENFM0045 (deoB)	13	100	Y
ENFM0046	13	100	Y
ENFM0047 (deoD)	13	100	Y
ENFM0048 (gpmA)	13	100	Y
ENFM0050	13	100	Y
ENFM0051 (rpiA)	13	100	Y
ENFM0052 (rpsL)	13	100	Y
ENFM0053 (rpsG)	13	100	Y
ENFM0054 (fusA)	13	100	Y
ENFM0055 (tuf)	13	100	Y
ENFM0056 (rpsJ)	13	100	Y
ENFM0057 (rplC)	13	100	Y
ENFM0058 (rplD)	13	100	Y
ENFM0059 (rplW)	13	100	Y
ENFM0061 (rplB)	13	100	Y
ENFM0062 (rpsS)	13	100	Y
ENFM0063 (rplV)	13	100	Y
ENFM0064 (rpsC)	13	100	Y
ENFM0065 (rplP)	13	100	Y
ENFM0066 (rpmC)	13	100	Y
ENFM0067 (rpsQ)	13	100	Y
ENFM0068 (rplN)	13	100	Y
ENFM0069 (rplX)	13	100	Y
ENFM0070 (rplE)	13	100	Y
ENFM0071	13	100	Y
ENFM0072 (rpsH)	13	100	Y
ENFM0073 (rplF)	13	100	Y
ENFM0074 (rplR)	13	100	Y
ENFM0075 (rpsE)	13	100	Y
ENFM0076 (rpmD)	13	100	Y
ENFM0077 (rplO)	13	100	Y
ENFM0078 (secY)	13	100	Y
ENFM0079	13	100	Y
ENFM0080 (infA)	13	100	Y
ENFM0081 (rpsM)	13	100	Y
ENFM0082 (rpsK)	13	100	Y
ENFM0083	13	100	Y
ENFM0084 (rplQ)	13	100	Y
ENFM0085	13	100	Y
ENFM0086	13	100	Y
ENFM0087	13	100	Y
ENFM0088 (truA)	13	100	Y
ENFM0089	13	100	Y
ENFM0090	13	100	Y
ENFM0091	13	100	Y
ENFM0092	13	100	Y
ENFM0093 (recG)	13	100	Y
ENFM0094 (plsX)	13	100	Y
ENFM0095 (acpP)	13	100	Y
ENFM0096	13	100	Y
ENFM0097	13	100	Y
ENFM0098	13	100	Y
ENFM0099	13	100	Y
ENFM0100	13	100	Y
ENFM0101	13	100	Y
ENFM0102 (smc)	13	100	Y
ENFM0103	13	100	Y
ENFM0104 (ftsY)	13	100	Y
ENFM0105 (gshAB)	13	100	Y
ENFM0106	13	100	Y
ENFM0107	13	100	Y
ENFM0108	13	100	Y
ENFM0109	13	100	Y
ENFM0110	13	100	Y
ENFM0111	13	100	Y
ENFM0112	13	100	Y
ENFM0113	13	100	Y
ENFM0114	10	76.9	-
ENFM0115	10	76.9	-
ENFM0116	10	76.9	-
ENFM0117	10	76.9	-
ENFM0118	12	92.3	Y
ENFM0119	12	92.3	Y
ENFM0120	11	84.6	-
ENFM0121	13	100	Y
ENFM0122	13	100	Y
ENFM0123	13	100	Y
ENFM0124	13	100	Y
ENFM0125	13	100	Y
ENFM0126	13	100	Y
ENFM0127	13	100	Y
ENFM0128	13	100	Y
ENFM0129 (rpsD)	13	100	Y
ENFM0130	13	100	Y
ENFM0131	13	100	Y
ENFM0132	13	100	Y
ENFM0133	13	100	Y
ENFM0134	13	100	Y
ENFM0135 (mutS)	13	100	Y
ENFM0136 (mutL)	13	100	Y
ENFM0137	13	100	Y
ENFM0138 (treP)	13	100	Y
ENFM0139 (treR)	13	100	Y
ENFM0140 (msrB)	13	100	Y
ENFM0143 (ruvB)	13	100	Y
ENFM0144	13	100	Y
ENFM0145	13	100	Y
ENFM0146	13	100	Y
ENFM0147	12	92.3	Y
ENFM0149 (brnQ)	13	100	Y
ENFM0150	13	100	Y
ENFM0151	13	100	Y
ENFM0152	13	100	Y
ENFM0153	13	100	Y
ENFM0154	13	100	Y
ENFM0155	13	100	Y
ENFM0156	13	100	Y
ENFM0157	13	100	Y
ENFM0158	13	100	Y
ENFM0159 (rpsO)	13	100	Y
ENFM0160 (pnp)	13	100	Y
ENFM0161	13	100	Y
ENFM0162	13	100	Y
ENFM0163	13	100	Y
ENFM0164	13	100	Y
ENFM0165	13	100	Y
ENFM0166	13	100	Y
ENFM0167	13	100	Y
ENFM0168	13	100	Y
ENFM0169 (udk)	13	100	Y
ENFM0173	13	100	Y
ENFM0174	13	100	Y
ENFM0175	13	100	Y
ENFM0176	13	100	Y
ENFM0177	13	100	Y
ENFM0178	13	100	Y
ENFM0179	13	100	Y
ENFM0180	13	100	Y
ENFM0181	13	100	Y
ENFM0182	13	100	Y
ENFM0183	13	100	Y
ENFM0186	13	100	Y
ENFM0188	12	92.3	Y
ENFM0189	13	100	Y
ENFM0190	10	76.9	-
ENFM0191	10	76.9	-
ENFM0192	10	76.9	-
ENFM0193	10	76.9	-
ENFM0195	13	100	Y
ENFM0196	13	100	Y
ENFM0197	13	100	Y
ENFM0198	13	100	Y
ENFM0199 (queA)	13	100	Y
ENFM0200	13	100	Y
ENFM0201	13	100	Y
ENFM0202 (tgt)	13	100	Y
ENFM0203 (yajC)	13	100	Y
ENFM0204 (adhE;adhC)	13	100	Y
ENFM0205	12	92.3	Y
ENFM0206	13	100	Y
ENFM0207	13	100	Y
ENFM0208	12	92.3	Y
ENFM0209	11	84.6	-
ENFM0210	11	84.6	-
ENFM0211	11	84.6	-
ENFM0212 (rhaB)	11	84.6	-
ENFM0213 (rhaA)	11	84.6	-
ENFM0214 (rhaD)	11	84.6	-
ENFM0215 (rhaM)	11	84.6	-
ENFM0216 (fucO)	11	84.6	-
ENFM0217	11	84.6	-
ENFM0218	11	84.6	-
ENFM0219	11	84.6	-
ENFM0220 (kduI)	12	92.3	Y
ENFM0221	13	100	Y
ENFM0222	13	100	Y
ENFM0223	13	100	Y
ENFM0224 (mvaD)	13	100	Y
ENFM0225 (mvk)	13	100	Y
ENFM0226	13	100	Y
ENFM0227	13	100	Y
ENFM0228	13	100	Y
ENFM0230 (infC)	13	100	Y
ENFM0231 (rpmI)	13	100	Y
ENFM0232 (rplT)	13	100	Y
ENFM0233	13	100	Y
ENFM0234	13	100	Y
ENFM0235	13	100	Y
ENFM0236	13	100	Y
ENFM0237	13	100	Y
ENFM0238	13	100	Y
ENFM0239	13	100	Y
ENFM0240 (pepV)	13	100	Y
ENFM0241	13	100	Y
ENFM0243	13	100	Y
ENFM0244 (pepA)	13	100	Y
ENFM0245	13	100	Y
ENFM0246	13	100	Y
ENFM0247	13	100	Y
ENFM0249	13	100	Y
ENFM0251 (rlmH)	13	100	Y
ENFM0252	4	30.8	-
ENFM0253	9	69.2	-
ENFM0254	4	30.8	-
ENFM0255	4	30.8	-
ENFM0256	12	92.3	Y
ENFM0257	3	23.1	-
ENFM0258	3	23.1	-
ENFM0259	12	92.3	Y
ENFM0260 (gadC)	5	38.5	-
ENFM0261	5	38.5	-
ENFM0262	5	38.5	-
ENFM0263	3	23.1	-
ENFM0268	5	38.5	-
ENFM0270	5	38.5	-
ENFM0271	1	7.7	-
ENFM0272	1	7.7	-
ENFM0273	4	30.8	-
ENFM0274	1	7.7	-
ENFM0275	1	7.7	-
ENFM0276	1	7.7	-
ENFM0277	1	7.7	-
ENFM0279	3	23.1	-
ENFM0280	3	23.1	-
ENFM0281	1	7.7	-
ENFM0282	11	84.6	-
ENFM0283	3	23.1	-
ENFM0285	6	46.2	-
ENFM0286	2	15.4	-
ENFM0287	2	15.4	-
ENFM0288	2	15.4	-
ENFM0289	2	15.4	-
ENFM0290	2	15.4	-
ENFM0291	2	15.4	-
ENFM0292	5	38.5	-
ENFM0293	9	69.2	-
ENFM0294	10	76.9	-
ENFM0295	11	84.6	-
ENFM0296	11	84.6	-
ENFM0297	11	84.6	-
ENFM0298 (msrA)	7	53.8	-
ENFM0300	13	100	Y
ENFM0301	10	76.9	-
ENFM0303	10	76.9	-
ENFM0305	5	38.5	-
ENFM0306	5	38.5	-
ENFM0308	5	38.5	-
ENFM0309	5	38.5	-
ENFM0310	5	38.5	-
ENFM0311	5	38.5	-
ENFM0312	11	84.6	-
ENFM0313	12	92.3	Y
ENFM0314	7	53.8	-
ENFM0315	8	61.5	-
ENFM0317 (sstT)	12	92.3	Y
ENFM0318	13	100	Y
ENFM0319 (truA)	12	92.3	Y
ENFM0320	9	69.2	-
ENFM0321	9	69.2	-
ENFM0324	10	76.9	-
ENFM0325	10	76.9	-
ENFM0326 (msrA)	13	100	Y
ENFM0327	13	100	Y
ENFM0328	13	100	Y
ENFM0329	13	100	Y
ENFM0330	13	100	Y
ENFM0331	13	100	Y
ENFM0332	13	100	Y
ENFM0333	13	100	Y
ENFM0334	10	76.9	-
ENFM0335	13	100	Y
ENFM0336	13	100	Y
ENFM0338	13	100	Y
ENFM0339	13	100	Y
ENFM0340	13	100	Y
ENFM0341	13	100	Y
ENFM0342	13	100	Y
ENFM0343	13	100	Y
ENFM0344 (tdc)	13	100	Y
ENFM0345	13	100	Y
ENFM0346	13	100	Y
ENFM0347	13	100	Y
ENFM0348	13	100	Y
ENFM0350	12	92.3	Y
ENFM0351	12	92.3	Y
ENFM0352	12	92.3	Y
ENFM0353 (mdcA)	12	92.3	Y
ENFM0354	12	92.3	Y
ENFM0355 (mdcD)	12	92.3	Y
ENFM0356	12	92.3	Y
ENFM0357	12	92.3	Y
ENFM0358 (mdcB)	12	92.3	Y
ENFM0359	12	92.3	Y
ENFM0361	13	100	Y
ENFM0362	13	100	Y
ENFM0365	13	100	Y
ENFM0366	13	100	Y
ENFM0367	13	100	Y
ENFM0368	13	100	Y
ENFM0369	13	100	Y
ENFM0370	13	100	Y
ENFM0371	13	100	Y
ENFM0372	13	100	Y
ENFM0373	12	92.3	Y
ENFM0374	12	92.3	Y
ENFM0375	13	100	Y
ENFM0376	13	100	Y
ENFM0377	10	76.9	-
ENFM0378	10	76.9	-
ENFM0379	10	76.9	-
ENFM0380 (ascB)	10	76.9	-
ENFM0381	13	100	Y
ENFM0382	13	100	Y
ENFM0383	13	100	Y
ENFM0384	13	100	Y
ENFM0385	13	100	Y
ENFM0386 (glpK)	13	100	Y
ENFM0388 (glpO)	13	100	Y
ENFM0389	13	100	Y
ENFM0390	13	100	Y
ENFM0392	13	100	Y
ENFM0393	13	100	Y
ENFM0394	13	100	Y
ENFM0395	13	100	Y
ENFM0396	13	100	Y
ENFM0397	13	100	Y
ENFM0398	13	100	Y
ENFM0399	13	100	Y
ENFM0400	13	100	Y
ENFM0401	13	100	Y
ENFM0402 (dhaM)	13	100	Y
ENFM0403 (dhaK)	13	100	Y
ENFM0404 (dhaL)	13	100	Y
ENFM0405	13	100	Y
ENFM0406	13	100	Y
ENFM0407	13	100	Y
ENFM0408	13	100	Y
ENFM0409	13	100	Y
ENFM0410	13	100	Y
ENFM0411	13	100	Y
ENFM0412 (tdc)	13	100	Y
ENFM0413	13	100	Y
ENFM0414 (nhaC)	13	100	Y
ENFM0415	13	100	Y
ENFM0416	13	100	Y
ENFM0417 (pgmB)	13	100	Y
ENFM0418	13	100	Y
ENFM0419	13	100	Y
ENFM0420	13	100	Y
ENFM0421	13	100	Y
ENFM0422	13	100	Y
ENFM0423	13	100	Y
ENFM0424	13	100	Y
ENFM0425	13	100	Y
ENFM0426	13	100	Y
ENFM0427	13	100	Y
ENFM0428	13	100	Y
ENFM0429	13	100	Y
ENFM0431	13	100	Y
ENFM0432	13	100	Y
ENFM0433	13	100	Y
ENFM0434	13	100	Y
ENFM0435	13	100	Y
ENFM0436	13	100	Y
ENFM0437	12	92.3	Y
ENFM0438	12	92.3	Y
ENFM0439	12	92.3	Y
ENFM0440	13	100	Y
ENFM0441	13	100	Y
ENFM0442	13	100	Y
ENFM0443	13	100	Y
ENFM0444	13	100	Y
ENFM0445	13	100	Y
ENFM0446	13	100	Y
ENFM0447	13	100	Y
ENFM0448	13	100	Y
ENFM0449	13	100	Y
ENFM0450	13	100	Y
ENFM0451 (rbsD)	13	100	Y
ENFM0452 (rbsK)	13	100	Y
ENFM0453	13	100	Y
ENFM0454	13	100	Y
ENFM0455	13	100	Y
ENFM0456	13	100	Y
ENFM0457 (treC)	13	100	Y
ENFM0458	13	100	Y
ENFM0459	13	100	Y
ENFM0460	13	100	Y
ENFM0461	13	100	Y
ENFM0462	13	100	Y
ENFM0463	13	100	Y
ENFM0464	13	100	Y
ENFM0465	13	100	Y
ENFM0466	13	100	Y
ENFM0467	13	100	Y
ENFM0468	13	100	Y
ENFM0469	13	100	Y
ENFM0470	13	100	Y
ENFM0471	13	100	Y
ENFM0472	13	100	Y
ENFM0474 (efp)	13	100	Y
ENFM0475	10	76.9	-
ENFM0476 (lysA)	13	100	Y
ENFM0477 (dapF)	13	100	Y
ENFM0478	13	100	Y
ENFM0479	13	100	Y
ENFM0480 (dapD)	13	100	Y
ENFM0481	13	100	Y
ENFM0482	13	100	Y
ENFM0483	13	100	Y
ENFM0484	13	100	Y
ENFM0485	13	100	Y
ENFM0486	11	84.6	-
ENFM0487	13	100	Y
ENFM0488	13	100	Y
ENFM0489	13	100	Y
ENFM0490	13	100	Y
ENFM0491	13	100	Y
ENFM0492	13	100	Y
ENFM0493	13	100	Y
ENFM0494	13	100	Y
ENFM0495	13	100	Y
ENFM0496	13	100	Y
ENFM0497	13	100	Y
ENFM0498	13	100	Y
ENFM0499	13	100	Y
ENFM0500	13	100	Y
ENFM0501	13	100	Y
ENFM0502 (queG)	13	100	Y
ENFM0503	13	100	Y
ENFM0504	13	100	Y
ENFM0505	13	100	Y
ENFM0506	13	100	Y
ENFM0507	13	100	Y
ENFM0508 (argR)	13	100	Y
ENFM0509	13	100	Y
ENFM0510	13	100	Y
ENFM0511	13	100	Y
ENFM0513	13	100	Y
ENFM0514	13	100	Y
ENFM0515	13	100	Y
ENFM0516	13	100	Y
ENFM0517	13	100	Y
ENFM0518	13	100	Y
ENFM0519	10	76.9	-
ENFM0520	10	76.9	-
ENFM0521	9	69.2	-
ENFM0523	8	61.5	-
ENFM0525	11	84.6	-
ENFM0526	11	84.6	-
ENFM0527	11	84.6	-
ENFM0528	11	84.6	-
ENFM0529	11	84.6	-
ENFM0530	11	84.6	-
ENFM0531	11	84.6	-
ENFM0532	11	84.6	-
ENFM0533	11	84.6	-
ENFM0534	10	76.9	-
ENFM0535	13	100	Y
ENFM0536	13	100	Y
ENFM0537	13	100	Y
ENFM0538	13	100	Y
ENFM0539	13	100	Y
ENFM0540	13	100	Y
ENFM0542	13	100	Y
ENFM0543	13	100	Y
ENFM0544	13	100	Y
ENFM0545	13	100	Y
ENFM0546	13	100	Y
ENFM0547	13	100	Y
ENFM0549	13	100	Y
ENFM0550	13	100	Y
ENFM0551	13	100	Y
ENFM0552	13	100	Y
ENFM0553	13	100	Y
ENFM0554 (efmA)	13	100	Y
ENFM0555	13	100	Y
ENFM0556 (mnmA)	13	100	Y
ENFM0557 (arcD)	13	100	Y
ENFM0558	13	100	Y
ENFM0559	13	100	Y
ENFM0560	13	100	Y
ENFM0561	13	100	Y
ENFM0562	13	100	Y
ENFM0563	13	100	Y
ENFM0564	13	100	Y
ENFM0565	13	100	Y
ENFM0566	13	100	Y
ENFM0567	13	100	Y
ENFM0568	13	100	Y
ENFM0569	13	100	Y
ENFM0570	13	100	Y
ENFM0571	13	100	Y
ENFM0573	13	100	Y
ENFM0574	13	100	Y
ENFM0575 (sufC)	13	100	Y
ENFM0576 (sufD)	13	100	Y
ENFM0577	13	100	Y
ENFM0578	13	100	Y
ENFM0579 (sufB)	13	100	Y
ENFM0580	3	23.1	-
ENFM0581	3	23.1	-
ENFM0582	2	15.4	-
ENFM0583	2	15.4	-
ENFM0584	4	30.8	-
ENFM0585	5	38.5	-
ENFM0586	4	30.8	-
ENFM0588	5	38.5	-
ENFM0589	8	61.5	-
ENFM0590	8	61.5	-
ENFM0591	2	15.4	-
ENFM0592	2	15.4	-
ENFM0593	2	15.4	-
ENFM0594	7	53.8	-
ENFM0595	7	53.8	-
ENFM0596	7	53.8	-
ENFM0597	7	53.8	-
ENFM0598	8	61.5	-
ENFM0599	8	61.5	-
ENFM0600	8	61.5	-
ENFM0601	8	61.5	-
ENFM0602	2	15.4	-
ENFM0603	6	46.2	-
ENFM0604	2	15.4	-
ENFM0605	7	53.8	-
ENFM0606	8	61.5	-
ENFM0607	13	100	Y
ENFM0608	13	100	Y
ENFM0609	13	100	Y
ENFM0610	7	53.8	-
ENFM0611	13	100	Y
ENFM0612	12	92.3	Y
ENFM0613	12	92.3	Y
ENFM0614	12	92.3	Y
ENFM0615	12	92.3	Y
ENFM0616	12	92.3	Y
ENFM0617	12	92.3	Y
ENFM0618	12	92.3	Y
ENFM0619	12	92.3	Y
ENFM0620	12	92.3	Y
ENFM0621	13	100	Y
ENFM0622	13	100	Y
ENFM0623	13	100	Y
ENFM0628	13	100	Y
ENFM0629	12	92.3	Y
ENFM0632	13	100	Y
ENFM0633	13	100	Y
ENFM0634	13	100	Y
ENFM0635	13	100	Y
ENFM0636	13	100	Y
ENFM0637	13	100	Y
ENFM0638	13	100	Y
ENFM0639	13	100	Y
ENFM0640	13	100	Y
ENFM0641 (ndk)	13	100	Y
ENFM0642 (mgtA)	13	100	Y
ENFM0643	13	100	Y
ENFM0644	13	100	Y
ENFM0645	13	100	Y
ENFM0646	13	100	Y
ENFM0647	13	100	Y
ENFM0648 (nhaC)	13	100	Y
ENFM0649	13	100	Y
ENFM0650	13	100	Y
ENFM0651	13	100	Y
ENFM0652	13	100	Y
ENFM0653	13	100	Y
ENFM0654 (eat(A))	13	100	Y
ENFM0655	13	100	Y
ENFM0656	13	100	Y
ENFM0657 (murQ)	13	100	Y
ENFM0658	13	100	Y
ENFM0659 (nrdI)	13	100	Y
ENFM0660	13	100	Y
ENFM0661	13	100	Y
ENFM0662	13	100	Y
ENFM0663	13	100	Y
ENFM0664	13	100	Y
ENFM0665	13	100	Y
ENFM0666 (pcp)	13	100	Y
ENFM0667	13	100	Y
ENFM0668	13	100	Y
ENFM0669	13	100	Y
ENFM0670	13	100	Y
ENFM0671	13	100	Y
ENFM0672	13	100	Y
ENFM0673	13	100	Y
ENFM0674	13	100	Y
ENFM0675	13	100	Y
ENFM0676 (pta)	13	100	Y
ENFM0677 (tsaE)	13	100	Y
ENFM0678	13	100	Y
ENFM0680	13	100	Y
ENFM0681 (xth)	13	100	Y
ENFM0682	13	100	Y
ENFM0683 (murB)	13	100	Y
ENFM0685	13	100	Y
ENFM0686	13	100	Y
ENFM0687	13	100	Y
ENFM0688	13	100	Y
ENFM0689	13	100	Y
ENFM0690	13	100	Y
ENFM0691	13	100	Y
ENFM0692	13	100	Y
ENFM0693 (coaC)	13	100	Y
ENFM0694	13	100	Y
ENFM0695	13	100	Y
ENFM0696	13	100	Y
ENFM0697	13	100	Y
ENFM0698	13	100	Y
ENFM0699	13	100	Y
ENFM0700	13	100	Y
ENFM0702	6	46.2	-
ENFM0703	6	46.2	-
ENFM0704	6	46.2	-
ENFM0705	6	46.2	-
ENFM0706	6	46.2	-
ENFM0707	6	46.2	-
ENFM0708	6	46.2	-
ENFM0709	10	76.9	-
ENFM0711	6	46.2	-
ENFM0712	6	46.2	-
ENFM0713	6	46.2	-
ENFM0714	6	46.2	-
ENFM0715	13	100	Y
ENFM0716	11	84.6	-
ENFM0717	13	100	Y
ENFM0718 (glnA)	13	100	Y
ENFM0719	13	100	Y
ENFM0721	13	100	Y
ENFM0722	13	100	Y
ENFM0723	13	100	Y
ENFM0724	13	100	Y
ENFM0725	13	100	Y
ENFM0726	13	100	Y
ENFM0727	13	100	Y
ENFM0728	13	100	Y
ENFM0729	13	100	Y
ENFM0730	13	100	Y
ENFM0731	13	100	Y
ENFM0732	13	100	Y
ENFM0733	13	100	Y
ENFM0734	13	100	Y
ENFM0735	13	100	Y
ENFM0736 (dnaX)	13	100	Y
ENFM0737	13	100	Y
ENFM0738 (recR)	13	100	Y
ENFM0739	13	100	Y
ENFM0740	13	100	Y
ENFM0741 (holB)	13	100	Y
ENFM0742	13	100	Y
ENFM0743	13	100	Y
ENFM0744 (rsmI)	13	100	Y
ENFM0745 (dinB)	13	100	Y
ENFM0746 (nrdG)	13	100	Y
ENFM0747 (nrdD)	13	100	Y
ENFM0748	13	100	Y
ENFM0749	13	100	Y
ENFM0750	13	100	Y
ENFM0751 (dltA)	13	100	Y
ENFM0752 (dltB)	13	100	Y
ENFM0753 (dltC)	13	100	Y
ENFM0754 (dltD)	13	100	Y
ENFM0755	13	100	Y
ENFM0756	13	100	Y
ENFM0757	13	100	Y
ENFM0758	13	100	Y
ENFM0759	13	100	Y
ENFM0760	13	100	Y
ENFM0761	13	100	Y
ENFM0762	13	100	Y
ENFM0763	13	100	Y
ENFM0764	13	100	Y
ENFM0765 (rplU)	13	100	Y
ENFM0766	13	100	Y
ENFM0767 (rpmA)	13	100	Y
ENFM0768	13	100	Y
ENFM0769	13	100	Y
ENFM0770 (manX)	13	100	Y
ENFM0771	13	100	Y
ENFM0772	13	100	Y
ENFM0773	13	100	Y
ENFM0774	13	100	Y
ENFM0775	13	100	Y
ENFM0776	13	100	Y
ENFM0777 (nusB)	13	100	Y
ENFM0778	13	100	Y
ENFM0779	13	100	Y
ENFM0780	13	100	Y
ENFM0781	13	100	Y
ENFM0782	13	100	Y
ENFM0783	13	100	Y
ENFM0784 (recN)	13	100	Y
ENFM0785	13	100	Y
ENFM0786	13	100	Y
ENFM0787	13	100	Y
ENFM0788 (mraZ)	13	100	Y
ENFM0789 (rsmH)	13	100	Y
ENFM0790 (ftsL)	13	100	Y
ENFM0791	13	100	Y
ENFM0792	13	100	Y
ENFM0793	13	100	Y
ENFM0794 (murG)	13	100	Y
ENFM0795	13	100	Y
ENFM0796 (ftsA)	13	100	Y
ENFM0797 (ftsZ)	13	100	Y
ENFM0798	13	100	Y
ENFM0799	13	100	Y
ENFM0800	13	100	Y
ENFM0801	13	100	Y
ENFM0802 (ileS)	13	100	Y
ENFM0803	13	100	Y
ENFM0804	13	100	Y
ENFM0805	13	100	Y
ENFM0807 (sfsA)	13	100	Y
ENFM0808	13	100	Y
ENFM0809	13	100	Y
ENFM0810	13	100	Y
ENFM0811	13	100	Y
ENFM0812	13	100	Y
ENFM0813	13	100	Y
ENFM0814	13	100	Y
ENFM0815	13	100	Y
ENFM0816	13	100	Y
ENFM0817	13	100	Y
ENFM0818	13	100	Y
ENFM0819	7	53.8	-
ENFM0820	2	15.4	-
ENFM0821	7	53.8	-
ENFM0822	7	53.8	-
ENFM0823	3	23.1	-
ENFM0825	2	15.4	-
ENFM0826	2	15.4	-
ENFM0827	4	30.8	-
ENFM0828	8	61.5	-
ENFM0829	7	53.8	-
ENFM0830	9	69.2	-
ENFM0831	6	46.2	-
ENFM0832	7	53.8	-
ENFM0834	11	84.6	-
ENFM0835	9	69.2	-
ENFM0836	11	84.6	-
ENFM0837	8	61.5	-
ENFM0838	8	61.5	-
ENFM0839	8	61.5	-
ENFM0840	11	84.6	-
ENFM0841	12	92.3	Y
ENFM0842	12	92.3	Y
ENFM0843	8	61.5	-
ENFM0844	6	46.2	-
ENFM0845	4	30.8	-
ENFM0846	4	30.8	-
ENFM0847	12	92.3	Y
ENFM0848	11	84.6	-
ENFM0849	4	30.8	-
ENFM0850	4	30.8	-
ENFM0851	4	30.8	-
ENFM0852	10	76.9	-
ENFM0853	8	61.5	-
ENFM0854	8	61.5	-
ENFM0855	8	61.5	-
ENFM0856	8	61.5	-
ENFM0857	8	61.5	-
ENFM0858	8	61.5	-
ENFM0859	8	61.5	-
ENFM0860	8	61.5	-
ENFM0861	8	61.5	-
ENFM0862	8	61.5	-
ENFM0863	8	61.5	-
ENFM0864	8	61.5	-
ENFM0865	8	61.5	-
ENFM0866	8	61.5	-
ENFM0867	8	61.5	-
ENFM0868	8	61.5	-
ENFM0869	8	61.5	-
ENFM0870	8	61.5	-
ENFM0871	3	23.1	-
ENFM0872	6	46.2	-
ENFM0873	12	92.3	Y
ENFM0874	12	92.3	Y
ENFM0875	11	84.6	-
ENFM0876	8	61.5	-
ENFM0877	13	100	Y
ENFM0879	13	100	Y
ENFM0880	6	46.2	-
ENFM0881	6	46.2	-
ENFM0882	6	46.2	-
ENFM0883	6	46.2	-
ENFM0884	13	100	Y
ENFM0885	10	76.9	-
ENFM0886	13	100	Y
ENFM0887	13	100	Y
ENFM0888	13	100	Y
ENFM0889 (map)	13	100	Y
ENFM0890	13	100	Y
ENFM0891	13	100	Y
ENFM0892	13	100	Y
ENFM0893	13	100	Y
ENFM0894	13	100	Y
ENFM0895 (rfbA)	13	100	Y
ENFM0896 (rfbC)	13	100	Y
ENFM0898 (rfbB)	13	100	Y
ENFM0899 (rfbD)	13	100	Y
ENFM0900	13	100	Y
ENFM0901	13	100	Y
ENFM0902	13	100	Y
ENFM0903	13	100	Y
ENFM0904	13	100	Y
ENFM0905	13	100	Y
ENFM0906	4	30.8	-
ENFM0907	13	100	Y
ENFM0908	4	30.8	-
ENFM0909	4	30.8	-
ENFM0910	4	30.8	-
ENFM0913	4	30.8	-
ENFM0914	4	30.8	-
ENFM0915	4	30.8	-
ENFM0916 (neuB)	4	30.8	-
ENFM0917 (neuC)	4	30.8	-
ENFM0918	4	30.8	-
ENFM0919	4	30.8	-
ENFM0920	4	30.8	-
ENFM0921	4	30.8	-
ENFM0922	4	30.8	-
ENFM0923	13	100	Y
ENFM0926	6	46.2	-
ENFM0927 (tnpB)	6	46.2	-
ENFM0928	6	46.2	-
ENFM0929	8	61.5	-
ENFM0930	11	84.6	-
ENFM0931	7	53.8	-
ENFM0932	4	30.8	-
ENFM0933	4	30.8	-
ENFM0934 (mltG)	13	100	Y
ENFM0935 (greA)	13	100	Y
ENFM0936	13	100	Y
ENFM0937	13	100	Y
ENFM0938	13	100	Y
ENFM0939	13	100	Y
ENFM0940	13	100	Y
ENFM0941	13	100	Y
ENFM0942	13	100	Y
ENFM0943	13	100	Y
ENFM0944	13	100	Y
ENFM0945	13	100	Y
ENFM0946	13	100	Y
ENFM0947	13	100	Y
ENFM0948	13	100	Y
ENFM0949	13	100	Y
ENFM0950 (rlmD)	13	100	Y
ENFM0951 (recX)	13	100	Y
ENFM0952 (mutY)	13	100	Y
ENFM0953	13	100	Y
ENFM0954	13	100	Y
ENFM0955	13	100	Y
ENFM0956	13	100	Y
ENFM0957	13	100	Y
ENFM0958	12	92.3	Y
ENFM0959	13	100	Y
ENFM0960	13	100	Y
ENFM0961	13	100	Y
ENFM0962 (ptsP)	13	100	Y
ENFM0963	13	100	Y
ENFM0964	13	100	Y
ENFM0965	13	100	Y
ENFM0966	13	100	Y
ENFM0967	13	100	Y
ENFM0968	13	100	Y
ENFM0969	13	100	Y
ENFM0970	13	100	Y
ENFM0971 (fabD)	13	100	Y
ENFM0972 (fabG)	13	100	Y
ENFM0973 (fabF)	13	100	Y
ENFM0974 (accB)	13	100	Y
ENFM0975 (fabZ)	13	100	Y
ENFM0976	13	100	Y
ENFM0977	13	100	Y
ENFM0978	13	100	Y
ENFM0979	13	100	Y
ENFM0980 (yqeH)	13	100	Y
ENFM0981 (yhbY)	13	100	Y
ENFM0982	13	100	Y
ENFM0983	13	100	Y
ENFM0984 (rsfS)	13	100	Y
ENFM0985	13	100	Y
ENFM0986	13	100	Y
ENFM0987	13	100	Y
ENFM0988	13	100	Y
ENFM0989	13	100	Y
ENFM0990 (cadA)	13	100	Y
ENFM0991	13	100	Y
ENFM0992 (thrS)	13	100	Y
ENFM0993	13	100	Y
ENFM0994	13	100	Y
ENFM0995	7	53.8	-
ENFM0996	13	100	Y
ENFM0997	13	100	Y
ENFM0998	13	100	Y
ENFM0999	13	100	Y
ENFM1000 (dnaE)	13	100	Y
ENFM1001 (pfkA)	13	100	Y
ENFM1002 (pyk)	13	100	Y
ENFM1003	13	100	Y
ENFM1004	13	100	Y
ENFM1005 (rpmF)	13	100	Y
ENFM1006 (gndA)	13	100	Y
ENFM1007	13	100	Y
ENFM1008	13	100	Y
ENFM1009	10	76.9	-
ENFM1010	10	76.9	-
ENFM1011	10	76.9	-
ENFM1012	10	76.9	-
ENFM1013	10	76.9	-
ENFM1014	13	100	Y
ENFM1015	13	100	Y
ENFM1019	10	76.9	-
ENFM1020	13	100	Y
ENFM1021	13	100	Y
ENFM1022 (ulaG)	13	100	Y
ENFM1023	13	100	Y
ENFM1024	13	100	Y
ENFM1025	13	100	Y
ENFM1026	13	100	Y
ENFM1027	13	100	Y
ENFM1028	12	92.3	Y
ENFM1029	10	76.9	-
ENFM1030	9	69.2	-
ENFM1031	10	76.9	-
ENFM1032	11	84.6	-
ENFM1033	10	76.9	-
ENFM1034	10	76.9	-
ENFM1035	6	46.2	-
ENFM1036	6	46.2	-
ENFM1037	6	46.2	-
ENFM1038	6	46.2	-
ENFM1039	6	46.2	-
ENFM1040	7	53.8	-
ENFM1041	6	46.2	-
ENFM1042	7	53.8	-
ENFM1043	6	46.2	-
ENFM1044	7	53.8	-
ENFM1045 (arsC)	7	53.8	-
ENFM1046	7	53.8	-
ENFM1047	7	53.8	-
ENFM1048	7	53.8	-
ENFM1049	7	53.8	-
ENFM1050	7	53.8	-
ENFM1051	7	53.8	-
ENFM1052	11	84.6	-
ENFM1053	11	84.6	-
ENFM1054	11	84.6	-
ENFM1055	12	92.3	Y
ENFM1056	12	92.3	Y
ENFM1057	12	92.3	Y
ENFM1059	12	92.3	Y
ENFM1060 (celB)	12	92.3	Y
ENFM1061	13	100	Y
ENFM1062	12	92.3	Y
ENFM1063	12	92.3	Y
ENFM1064	12	92.3	Y
ENFM1065	12	92.3	Y
ENFM1066	12	92.3	Y
ENFM1067 (thiD)	12	92.3	Y
ENFM1068 (cls)	12	92.3	Y
ENFM1069	12	92.3	Y
ENFM1070	13	100	Y
ENFM1071	13	100	Y
ENFM1072	13	100	Y
ENFM1073	13	100	Y
ENFM1075	13	100	Y
ENFM1076	13	100	Y
ENFM1079	7	53.8	-
ENFM1080	13	100	Y
ENFM1081 (tuf)	13	100	Y
ENFM1082 (mprF)	13	100	Y
ENFM1083	13	100	Y
ENFM1084	13	100	Y
ENFM1085	13	100	Y
ENFM1086	13	100	Y
ENFM1087	13	100	Y
ENFM1088 (rpoD)	13	100	Y
ENFM1089	13	100	Y
ENFM1090	13	100	Y
ENFM1091	13	100	Y
ENFM1092 (xerD)	13	100	Y
ENFM1093	13	100	Y
ENFM1094	13	100	Y
ENFM1095 (scpB)	13	100	Y
ENFM1096	13	100	Y
ENFM1097	13	100	Y
ENFM1100	13	100	Y
ENFM1101	13	100	Y
ENFM1102	13	100	Y
ENFM1103	13	100	Y
ENFM1104	13	100	Y
ENFM1105	13	100	Y
ENFM1106	13	100	Y
ENFM1107	13	100	Y
ENFM1108 (rpsA)	13	100	Y
ENFM1109	13	100	Y
ENFM1110	13	100	Y
ENFM1111	13	100	Y
ENFM1112	13	100	Y
ENFM1113	13	100	Y
ENFM1114	13	100	Y
ENFM1115	13	100	Y
ENFM1118	13	100	Y
ENFM1119	13	100	Y
ENFM1120	13	100	Y
ENFM1121	13	100	Y
ENFM1122	13	100	Y
ENFM1123	13	100	Y
ENFM1124	13	100	Y
ENFM1125	13	100	Y
ENFM1126	13	100	Y
ENFM1127	13	100	Y
ENFM1128 (msrA)	13	100	Y
ENFM1129	13	100	Y
ENFM1130 (lepB)	13	100	Y
ENFM1131	13	100	Y
ENFM1132	13	100	Y
ENFM1133 (ylqF)	13	100	Y
ENFM1136 (dprA)	13	100	Y
ENFM1137 (topA)	13	100	Y
ENFM1138 (trmFO)	13	100	Y
ENFM1139 (xerC)	13	100	Y
ENFM1140 (hslV)	13	100	Y
ENFM1141 (hslU)	13	100	Y
ENFM1142 (codY)	13	100	Y
ENFM1143	13	100	Y
ENFM1144 (plsY)	13	100	Y
ENFM1145	13	100	Y
ENFM1146 (parE)	13	100	Y
ENFM1147 (parC)	13	100	Y
ENFM1148 (pflB)	13	100	Y
ENFM1149 (pflA)	13	100	Y
ENFM1150	13	100	Y
ENFM1151	13	100	Y
ENFM1152	13	100	Y
ENFM1153	13	100	Y
ENFM1154	13	100	Y
ENFM1155	13	100	Y
ENFM1156	13	100	Y
ENFM1157	13	100	Y
ENFM1158	13	100	Y
ENFM1159	13	100	Y
ENFM1160	13	100	Y
ENFM1162	13	100	Y
ENFM1163	13	100	Y
ENFM1164	13	100	Y
ENFM1165	13	100	Y
ENFM1166	13	100	Y
ENFM1167	13	100	Y
ENFM1168	13	100	Y
ENFM1169	13	100	Y
ENFM1170	13	100	Y
ENFM1171	13	100	Y
ENFM1172	10	76.9	-
ENFM1173	9	69.2	-
ENFM1174	12	92.3	Y
ENFM1175	9	69.2	-
ENFM1176	13	100	Y
ENFM1177	13	100	Y
ENFM1178	13	100	Y
ENFM1179 (nagA)	13	100	Y
ENFM1180	13	100	Y
ENFM1181	13	100	Y
ENFM1182	13	100	Y
ENFM1183	13	100	Y
ENFM1184	13	100	Y
ENFM1185	13	100	Y
ENFM1186	13	100	Y
ENFM1187	13	100	Y
ENFM1188	13	100	Y
ENFM1189	13	100	Y
ENFM1190	13	100	Y
ENFM1191	13	100	Y
ENFM1192	13	100	Y
ENFM1193	13	100	Y
ENFM1194	13	100	Y
ENFM1195	13	100	Y
ENFM1196	13	100	Y
ENFM1197	13	100	Y
ENFM1198	13	100	Y
ENFM1199	13	100	Y
ENFM1200	13	100	Y
ENFM1202 (purE)	13	100	Y
ENFM1203 (purK)	13	100	Y
ENFM1204 (purB)	13	100	Y
ENFM1205	13	100	Y
ENFM1206	13	100	Y
ENFM1207 (purS)	13	100	Y
ENFM1208 (purQ)	13	100	Y
ENFM1209 (purL)	13	100	Y
ENFM1210	13	100	Y
ENFM1211	13	100	Y
ENFM1212 (purN)	13	100	Y
ENFM1213 (purH)	13	100	Y
ENFM1214 (purD)	13	100	Y
ENFM1215	13	100	Y
ENFM1216	13	100	Y
ENFM1217	13	100	Y
ENFM1218	13	100	Y
ENFM1220	13	100	Y
ENFM1221	13	100	Y
ENFM1222	13	100	Y
ENFM1223 (guaC)	13	100	Y
ENFM1224	13	100	Y
ENFM1225 (pdhA)	13	100	Y
ENFM1226	13	100	Y
ENFM1227	13	100	Y
ENFM1228 (lpdA)	13	100	Y
ENFM1229	13	100	Y
ENFM1230	13	100	Y
ENFM1231 (typA)	13	100	Y
ENFM1232 (recQ)	13	100	Y
ENFM1233	13	100	Y
ENFM1234	13	100	Y
ENFM1235	13	100	Y
ENFM1236	13	100	Y
ENFM1237	13	100	Y
ENFM1238	13	100	Y
ENFM1239 (rsmD)	13	100	Y
ENFM1240 (coaD)	13	100	Y
ENFM1241	13	100	Y
ENFM1242	13	100	Y
ENFM1243	10	76.9	-
ENFM1244	10	76.9	-
ENFM1245	13	100	Y
ENFM1246	13	100	Y
ENFM1247 (holA)	13	100	Y
ENFM1248	13	100	Y
ENFM1249	13	100	Y
ENFM1251	13	100	Y
ENFM1252	13	100	Y
ENFM1253	13	100	Y
ENFM1254	13	100	Y
ENFM1255	13	100	Y
ENFM1256	13	100	Y
ENFM1257	13	100	Y
ENFM1258	13	100	Y
ENFM1259	13	100	Y
ENFM1260	13	100	Y
ENFM1262	13	100	Y
ENFM1263	13	100	Y
ENFM1264	13	100	Y
ENFM1265	13	100	Y
ENFM1266	13	100	Y
ENFM1268	13	100	Y
ENFM1269	13	100	Y
ENFM1270	13	100	Y
ENFM1272	13	100	Y
ENFM1273	13	100	Y
ENFM1274	13	100	Y
ENFM1275	13	100	Y
ENFM1276	13	100	Y
ENFM1277	13	100	Y
ENFM1278	13	100	Y
ENFM1279	13	100	Y
ENFM1280 (addA)	13	100	Y
ENFM1281	13	100	Y
ENFM1282 (pheS)	13	100	Y
ENFM1283	13	100	Y
ENFM1284 (trpS)	13	100	Y
ENFM1285	13	100	Y
ENFM1286	13	100	Y
ENFM1287	13	100	Y
ENFM1288	13	100	Y
ENFM1289 (racE)	13	100	Y
ENFM1290 (rph)	13	100	Y
ENFM1291	13	100	Y
ENFM1292	13	100	Y
ENFM1293	13	100	Y
ENFM1294	13	100	Y
ENFM1295 (fabI)	13	100	Y
ENFM1296 (fabZ)	13	100	Y
ENFM1297	13	100	Y
ENFM1298	13	100	Y
ENFM1299	13	100	Y
ENFM1300 (gap)	13	100	Y
ENFM1301 (obgE)	13	100	Y
ENFM1302	13	100	Y
ENFM1303	13	100	Y
ENFM1304	13	100	Y
ENFM1305	13	100	Y
ENFM1306 (recJ)	13	100	Y
ENFM1307	13	100	Y
ENFM1308	13	100	Y
ENFM1309 (lexA)	13	100	Y
ENFM1310	13	100	Y
ENFM1311 (tkt)	13	100	Y
ENFM1312	13	100	Y
ENFM1313 (cysK)	13	100	Y
ENFM1315	13	100	Y
ENFM1316	13	100	Y
ENFM1317	13	100	Y
ENFM1318	13	100	Y
ENFM1319	13	100	Y
ENFM1320	13	100	Y
ENFM1321 (nth)	13	100	Y
ENFM1322	10	76.9	-
ENFM1323	13	100	Y
ENFM1324 (recU)	13	100	Y
ENFM1326 (gpsB)	13	100	Y
ENFM1327	13	100	Y
ENFM1328	13	100	Y
ENFM1329	13	100	Y
ENFM1330	13	100	Y
ENFM1331	13	100	Y
ENFM1332	13	100	Y
ENFM1333	13	100	Y
ENFM1334	13	100	Y
ENFM1335	13	100	Y
ENFM1336	13	100	Y
ENFM1337 (alaS)	13	100	Y
ENFM1338	13	100	Y
ENFM1339	13	100	Y
ENFM1340	13	100	Y
ENFM1341	13	100	Y
ENFM1342	13	100	Y
ENFM1343	13	100	Y
ENFM1344	13	100	Y
ENFM1345	13	100	Y
ENFM1346	13	100	Y
ENFM1347	13	100	Y
ENFM1348 (pyrR)	13	100	Y
ENFM1349	13	100	Y
ENFM1350	13	100	Y
ENFM1351	13	100	Y
ENFM1352 (carA)	13	100	Y
ENFM1353 (carB)	13	100	Y
ENFM1354	13	100	Y
ENFM1355	13	100	Y
ENFM1356 (pyrF)	13	100	Y
ENFM1357	13	100	Y
ENFM1358	13	100	Y
ENFM1359	13	100	Y
ENFM1360	13	100	Y
ENFM1361	13	100	Y
ENFM1363	13	100	Y
ENFM1364	11	84.6	-
ENFM1365	13	100	Y
ENFM1366	13	100	Y
ENFM1367	13	100	Y
ENFM1368	13	100	Y
ENFM1369 (aroE)	13	100	Y
ENFM1370	13	100	Y
ENFM1373 (topB)	13	100	Y
ENFM1374	13	100	Y
ENFM1375	13	100	Y
ENFM1376	13	100	Y
ENFM1377	13	100	Y
ENFM1379	11	84.6	-
ENFM1381	11	84.6	-
ENFM1382	11	84.6	-
ENFM1383	13	100	Y
ENFM1384	13	100	Y
ENFM1385	13	100	Y
ENFM1387	13	100	Y
ENFM1388	13	100	Y
ENFM1390	12	92.3	Y
ENFM1391	12	92.3	Y
ENFM1392	11	84.6	-
ENFM1393	11	84.6	-
ENFM1394	11	84.6	-
ENFM1395	12	92.3	Y
ENFM1396	12	92.3	Y
ENFM1397	12	92.3	Y
ENFM1398	13	100	Y
ENFM1399	13	100	Y
ENFM1400	13	100	Y
ENFM1401	12	92.3	Y
ENFM1402	13	100	Y
ENFM1403	13	100	Y
ENFM1405	13	100	Y
ENFM1406	13	100	Y
ENFM1407	13	100	Y
ENFM1408	13	100	Y
ENFM1409	13	100	Y
ENFM1410	13	100	Y
ENFM1411	13	100	Y
ENFM1412	13	100	Y
ENFM1413	13	100	Y
ENFM1414	13	100	Y
ENFM1415	13	100	Y
ENFM1416	13	100	Y
ENFM1417	13	100	Y
ENFM1418	13	100	Y
ENFM1419	13	100	Y
ENFM1420	13	100	Y
ENFM1421	13	100	Y
ENFM1422	13	100	Y
ENFM1423	13	100	Y
ENFM1424	13	100	Y
ENFM1425	13	100	Y
ENFM1426	13	100	Y
ENFM1427	13	100	Y
ENFM1428	13	100	Y
ENFM1429	13	100	Y
ENFM1430	13	100	Y
ENFM1431	13	100	Y
ENFM1432	13	100	Y
ENFM1433	13	100	Y
ENFM1436	13	100	Y
ENFM1437	13	100	Y
ENFM1438	13	100	Y
ENFM1439	13	100	Y
ENFM1440	13	100	Y
ENFM1442	13	100	Y
ENFM1443	13	100	Y
ENFM1444	13	100	Y
ENFM1445	13	100	Y
ENFM1446	13	100	Y
ENFM1447	13	100	Y
ENFM1448 (uxuA)	13	100	Y
ENFM1449	13	100	Y
ENFM1450	13	100	Y
ENFM1451 (ahpC)	13	100	Y
ENFM1452 (ahpF)	13	100	Y
ENFM1453	13	100	Y
ENFM1454	13	100	Y
ENFM1455	13	100	Y
ENFM1456	13	100	Y
ENFM1457	12	92.3	Y
ENFM1458	13	100	Y
ENFM1459	13	100	Y
ENFM1460	11	84.6	-
ENFM1462	13	100	Y
ENFM1463	13	100	Y
ENFM1464	13	100	Y
ENFM1465	13	100	Y
ENFM1466	13	100	Y
ENFM1467	13	100	Y
ENFM1468	12	92.3	Y
ENFM1469	13	100	Y
ENFM1470 (glsA)	13	100	Y
ENFM1471	13	100	Y
ENFM1472	13	100	Y
ENFM1474	13	100	Y
ENFM1475	13	100	Y
ENFM1476	13	100	Y
ENFM1477 (amaP)	13	100	Y
ENFM1478	13	100	Y
ENFM1479	13	100	Y
ENFM1480	13	100	Y
ENFM1481	13	100	Y
ENFM1482	13	100	Y
ENFM1483	13	100	Y
ENFM1484	13	100	Y
ENFM1485 (amaP)	13	100	Y
ENFM1486	13	100	Y
ENFM1487	13	100	Y
ENFM1488	13	100	Y
ENFM1489	13	100	Y
ENFM1490	13	100	Y
ENFM1491	13	100	Y
ENFM1492	12	92.3	Y
ENFM1493	13	100	Y
ENFM1494	13	100	Y
ENFM1495	13	100	Y
ENFM1496	13	100	Y
ENFM1497	13	100	Y
ENFM1499	13	100	Y
ENFM1500	13	100	Y
ENFM1502	11	84.6	-
ENFM1503 (uxuA)	10	76.9	-
ENFM1504	10	76.9	-
ENFM1505	10	76.9	-
ENFM1506	10	76.9	-
ENFM1507	10	76.9	-
ENFM1508	10	76.9	-
ENFM1509	10	76.9	-
ENFM1510	10	76.9	-
ENFM1511	10	76.9	-
ENFM1512	11	84.6	-
ENFM1513 (gnd)	11	84.6	-
ENFM1514	11	84.6	-
ENFM1515	13	100	Y
ENFM1516	13	100	Y
ENFM1517	13	100	Y
ENFM1518	13	100	Y
ENFM1519	9	69.2	-
ENFM1520	7	53.8	-
ENFM1521	7	53.8	-
ENFM1523 (sgrA)	9	69.2	-
ENFM1524	12	92.3	Y
ENFM1525	13	100	Y
ENFM1526	11	84.6	-
ENFM1527	11	84.6	-
ENFM1528	6	46.2	-
ENFM1529	11	84.6	-
ENFM1530 (srlA)	11	84.6	-
ENFM1531	11	84.6	-
ENFM1532	11	84.6	-
ENFM1533	11	84.6	-
ENFM1534	13	100	Y
ENFM1535	13	100	Y
ENFM1536	13	100	Y
ENFM1538	11	84.6	-
ENFM1540	12	92.3	Y
ENFM1541	11	84.6	-
ENFM1542	10	76.9	-
ENFM1543 (lepA)	12	92.3	Y
ENFM1544	12	92.3	Y
ENFM1545	12	92.3	Y
ENFM1546	12	92.3	Y
ENFM1548 (clpB)	12	92.3	Y
ENFM1549	13	100	Y
ENFM1550	13	100	Y
ENFM1551	13	100	Y
ENFM1552 (pepT)	13	100	Y
ENFM1553	13	100	Y
ENFM1554	13	100	Y
ENFM1555	13	100	Y
ENFM1556 (dnaI)	13	100	Y
ENFM1557	13	100	Y
ENFM1558 (nrdR)	13	100	Y
ENFM1559	13	100	Y
ENFM1560	13	100	Y
ENFM1561 (mutM)	13	100	Y
ENFM1562 (polA)	13	100	Y
ENFM1563	13	100	Y
ENFM1564	13	100	Y
ENFM1565	13	100	Y
ENFM1566	13	100	Y
ENFM1567	13	100	Y
ENFM1568	13	100	Y
ENFM1569	13	100	Y
ENFM1570	13	100	Y
ENFM1571	13	100	Y
ENFM1572	13	100	Y
ENFM1573	13	100	Y
ENFM1574	13	100	Y
ENFM1575	13	100	Y
ENFM1576	13	100	Y
ENFM1577	13	100	Y
ENFM1578	13	100	Y
ENFM1579	13	100	Y
ENFM1580	13	100	Y
ENFM1581	13	100	Y
ENFM1582	13	100	Y
ENFM1583	13	100	Y
ENFM1584	13	100	Y
ENFM1585	13	100	Y
ENFM1586	13	100	Y
ENFM1587 (pheA)	13	100	Y
ENFM1588	13	100	Y
ENFM1589 (aroA)	13	100	Y
ENFM1590	13	100	Y
ENFM1591 (aroC)	13	100	Y
ENFM1592 (aroB)	13	100	Y
ENFM1593 (aroF)	13	100	Y
ENFM1595	13	100	Y
ENFM1596	13	100	Y
ENFM1597	13	100	Y
ENFM1600	13	100	Y
ENFM1601	13	100	Y
ENFM1602	13	100	Y
ENFM1603 (rlmD)	13	100	Y
ENFM1604	13	100	Y
ENFM1605 (gatB)	13	100	Y
ENFM1606 (gatA)	13	100	Y
ENFM1607 (gatC)	13	100	Y
ENFM1608 (ligA)	13	100	Y
ENFM1609 (pcrA)	13	100	Y
ENFM1610	13	100	Y
ENFM1611	13	100	Y
ENFM1612 (pfkB)	13	100	Y
ENFM1613	13	100	Y
ENFM1614	13	100	Y
ENFM1615	13	100	Y
ENFM1616	13	100	Y
ENFM1617	13	100	Y
ENFM1618 (clpX)	13	100	Y
ENFM1619	13	100	Y
ENFM1620	13	100	Y
ENFM1621	13	100	Y
ENFM1622 (sppA)	13	100	Y
ENFM1623	13	100	Y
ENFM1624 (glmS)	13	100	Y
ENFM1625	13	100	Y
ENFM1626	13	100	Y
ENFM1627	13	100	Y
ENFM1628 (nifJ)	13	100	Y
ENFM1629	13	100	Y
ENFM1630	10	76.9	-
ENFM1631	6	46.2	-
ENFM1632	6	46.2	-
ENFM1633	6	46.2	-
ENFM1634	6	46.2	-
ENFM1635	11	84.6	-
ENFM1636	6	46.2	-
ENFM1637	6	46.2	-
ENFM1639 (whiA)	13	100	Y
ENFM1640	13	100	Y
ENFM1641 (rapZ)	13	100	Y
ENFM1642	13	100	Y
ENFM1643	13	100	Y
ENFM1644 (uvrA)	13	100	Y
ENFM1645 (uvrB)	13	100	Y
ENFM1646	13	100	Y
ENFM1647	13	100	Y
ENFM1648	10	76.9	-
ENFM1649	6	46.2	-
ENFM1650 (dnaJ)	13	100	Y
ENFM1651 (dnaK)	13	100	Y
ENFM1653 (grpE)	13	100	Y
ENFM1654 (hrcA)	13	100	Y
ENFM1655	13	100	Y
ENFM1656	13	100	Y
ENFM1657	13	100	Y
ENFM1658	13	100	Y
ENFM1659	13	100	Y
ENFM1660	13	100	Y
ENFM1661	13	100	Y
ENFM1662	13	100	Y
ENFM1663	13	100	Y
ENFM1664	13	100	Y
ENFM1665 (ribF)	13	100	Y
ENFM1666 (truB)	13	100	Y
ENFM1672 (rbfA)	13	100	Y
ENFM1673 (infB)	13	100	Y
ENFM1674	13	100	Y
ENFM1675	13	100	Y
ENFM1676 (nusA)	13	100	Y
ENFM1677 (rimP)	13	100	Y
ENFM1678	13	100	Y
ENFM1679	13	100	Y
ENFM1680 (rseP)	13	100	Y
ENFM1681	13	100	Y
ENFM1682	13	100	Y
ENFM1683 (frr)	13	100	Y
ENFM1684	13	100	Y
ENFM1685	13	100	Y
ENFM1686 (rpsB)	13	100	Y
ENFM1687	13	100	Y
ENFM1688 (phnW)	13	100	Y
ENFM1690	13	100	Y
ENFM1691	13	100	Y
ENFM1692 (arcC)	13	100	Y
ENFM1693 (argF)	13	100	Y
ENFM1694 (arcA)	13	100	Y
ENFM1695	13	100	Y
ENFM1696 (tsaD)	13	100	Y
ENFM1697 (rimI)	13	100	Y
ENFM1698 (rimI)	13	100	Y
ENFM1699 (tsaB)	13	100	Y
ENFM1700	13	100	Y
ENFM1701 (galT)	13	100	Y
ENFM1702 (galE)	13	100	Y
ENFM1703	13	100	Y
ENFM1704	13	100	Y
ENFM1705	13	100	Y
ENFM1706	13	100	Y
ENFM1707	13	100	Y
ENFM1708	13	100	Y
ENFM1709	13	100	Y
ENFM1710	13	100	Y
ENFM1711	13	100	Y
ENFM1712	13	100	Y
ENFM1713	13	100	Y
ENFM1714	13	100	Y
ENFM1715	13	100	Y
ENFM1716 (rpmG)	13	100	Y
ENFM1717	13	100	Y
ENFM1718 (asnB)	13	100	Y
ENFM1719	8	61.5	-
ENFM1720	13	100	Y
ENFM1721	11	84.6	-
ENFM1722	13	100	Y
ENFM1723	13	100	Y
ENFM1724	13	100	Y
ENFM1725	13	100	Y
ENFM1726	13	100	Y
ENFM1727	13	100	Y
ENFM1728	11	84.6	-
ENFM1729	13	100	Y
ENFM1730	13	100	Y
ENFM1731	13	100	Y
ENFM1733	13	100	Y
ENFM1734	12	92.3	Y
ENFM1735	13	100	Y
ENFM1737	13	100	Y
ENFM1738	13	100	Y
ENFM1739 (gdhA)	13	100	Y
ENFM1740	13	100	Y
ENFM1741 (ybaK)	13	100	Y
ENFM1742 (aroD)	13	100	Y
ENFM1743	13	100	Y
ENFM1744	13	100	Y
ENFM1745	13	100	Y
ENFM1746	13	100	Y
ENFM1747	13	100	Y
ENFM1748	13	100	Y
ENFM1749	13	100	Y
ENFM1750	13	100	Y
ENFM1751	13	100	Y
ENFM1752	12	92.3	Y
ENFM1754	12	92.3	Y
ENFM1755	10	76.9	-
ENFM1757	13	100	Y
ENFM1758	13	100	Y
ENFM1759 (budA)	13	100	Y
ENFM1760 (alsS)	13	100	Y
ENFM1761	12	92.3	Y
ENFM1762	12	92.3	Y
ENFM1763	12	92.3	Y
ENFM1764	12	92.3	Y
ENFM1765	7	53.8	-
ENFM1766	7	53.8	-
ENFM1767	7	53.8	-
ENFM1768	8	61.5	-
ENFM1769	10	76.9	-
ENFM1770	8	61.5	-
ENFM1771	8	61.5	-
ENFM1773	8	61.5	-
ENFM1774	8	61.5	-
ENFM1775	8	61.5	-
ENFM1776	8	61.5	-
ENFM1777	8	61.5	-
ENFM1778	8	61.5	-
ENFM1780	13	100	Y
ENFM1782	5	38.5	-
ENFM1783	5	38.5	-
ENFM1784	5	38.5	-
ENFM1785	5	38.5	-
ENFM1786	5	38.5	-
ENFM1787	6	46.2	-
ENFM1788 (tnpB)	6	46.2	-
ENFM1789	6	46.2	-
ENFM1790	5	38.5	-
ENFM1791	5	38.5	-
ENFM1792	5	38.5	-
ENFM1793	5	38.5	-
ENFM1794	5	38.5	-
ENFM1795	5	38.5	-
ENFM1796	5	38.5	-
ENFM1797	12	92.3	Y
ENFM1798	5	38.5	-
ENFM1799	5	38.5	-
ENFM1800	5	38.5	-
ENFM1801	5	38.5	-
ENFM1802	13	100	Y
ENFM1804	5	38.5	-
ENFM1805	11	84.6	-
ENFM1806	5	38.5	-
ENFM1807	5	38.5	-
ENFM1808	5	38.5	-
ENFM1809	6	46.2	-
ENFM1810	6	46.2	-
ENFM1811	6	46.2	-
ENFM1812	7	53.8	-
ENFM1813	6	46.2	-
ENFM1814	6	46.2	-
ENFM1815	5	38.5	-
ENFM1816	5	38.5	-
ENFM1817	6	46.2	-
ENFM1818	6	46.2	-
ENFM1819 (ltrA)	6	46.2	-
ENFM1820	6	46.2	-
ENFM1821	6	46.2	-
ENFM1822	5	38.5	-
ENFM1823	6	46.2	-
ENFM1824	6	46.2	-
ENFM1825	6	46.2	-
ENFM1826	6	46.2	-
ENFM1827	6	46.2	-
ENFM1828 (fss3)	6	46.2	-
ENFM1829	5	38.5	-
ENFM1831 (rplS)	13	100	Y
ENFM1832 (trmD)	13	100	Y
ENFM1833 (rimM)	13	100	Y
ENFM1834	13	100	Y
ENFM1835	13	100	Y
ENFM1836 (rpsP)	13	100	Y
ENFM1837	13	100	Y
ENFM1838	13	100	Y
ENFM1839	13	100	Y
ENFM1840 (ffh)	13	100	Y
ENFM1841	13	100	Y
ENFM1842	13	100	Y
ENFM1843	13	100	Y
ENFM1844	13	100	Y
ENFM1845	13	100	Y
ENFM1846	4	30.8	-
ENFM1851 (pstS)	13	100	Y
ENFM1852	13	100	Y
ENFM1853	13	100	Y
ENFM1854	12	92.3	Y
ENFM1855	7	53.8	-
ENFM1856	10	76.9	-
ENFM1857	13	100	Y
ENFM1862	13	100	Y
ENFM1863	13	100	Y
ENFM1867	12	92.3	Y
ENFM1871	13	100	Y
ENFM1872	11	84.6	-
ENFM1873	13	100	Y
ENFM1874	13	100	Y
ENFM1875	13	100	Y
ENFM1876	13	100	Y
ENFM1877	13	100	Y
ENFM1880 (copB)	13	100	Y
ENFM1881	13	100	Y
ENFM1882 (copZ)	13	100	Y
ENFM1883	13	100	Y
ENFM1884	13	100	Y
ENFM1885	10	76.9	-
ENFM1887	13	100	Y
ENFM1888 (cadA)	13	100	Y
ENFM1891	13	100	Y
ENFM1892	13	100	Y
ENFM1893	13	100	Y
ENFM1894 (asnS)	13	100	Y
ENFM1895	13	100	Y
ENFM1896	13	100	Y
ENFM1897	13	100	Y
ENFM1898	13	100	Y
ENFM1900	13	100	Y
ENFM1902	13	100	Y
ENFM1904	13	100	Y
ENFM1905	13	100	Y
ENFM1906	13	100	Y
ENFM1907	13	100	Y
ENFM1908	13	100	Y
ENFM1910	13	100	Y
ENFM1911	13	100	Y
ENFM1912	8	61.5	-
ENFM1913 (yidC)	13	100	Y
ENFM1917	13	100	Y
ENFM1918	10	76.9	-
ENFM1919	10	76.9	-
ENFM1920	1	7.7	-
ENFM1922	13	100	Y
ENFM1924	1	7.7	-
ENFM1926	11	84.6	-
ENFM1927	1	7.7	-
ENFM1929	1	7.7	-
ENFM1931	1	7.7	-
ENFM1933	6	46.2	-
ENFM1934 (tnpB)	6	46.2	-
ENFM1935	6	46.2	-
ENFM1936	1	7.7	-
ENFM1937	1	7.7	-
ENFM1938	2	15.4	-
ENFM1939	2	15.4	-
ENFM1940	1	7.7	-
ENFM1941	2	15.4	-
ENFM1943	2	15.4	-
ENFM1944	2	15.4	-
ENFM1945 (gmd)	2	15.4	-
ENFM1946	1	7.7	-
ENFM1948	1	7.7	-
ENFM1951	2	15.4	-
ENFM1952	1	7.7	-
ENFM1953	1	7.7	-
ENFM1954	1	7.7	-
ENFM1955	1	7.7	-
ENFM1956	1	7.7	-
ENFM1957	1	7.7	-
ENFM1958	1	7.7	-
ENFM1959	6	46.2	-
ENFM1960	2	15.4	-
ENFM1961	1	7.7	-
ENFM1964	11	84.6	-
ENFM1965	2	15.4	-
ENFM1966	4	30.8	-
ENFM1967	12	92.3	Y
ENFM1968	13	100	Y
ENFM1969	13	100	Y
ENFM1970	13	100	Y
ENFM1971	13	100	Y
ENFM1972	13	100	Y
ENFM1973 (glyQ)	13	100	Y
ENFM1974 (recO)	13	100	Y
ENFM1975	13	100	Y
ENFM1976	13	100	Y
ENFM1977 (ybeY)	13	100	Y
ENFM1978	13	100	Y
ENFM1979	13	100	Y
ENFM1980 (brnQ)	13	100	Y
ENFM1981	10	76.9	-
ENFM1982	13	100	Y
ENFM1983	13	100	Y
ENFM1985	13	100	Y
ENFM1986	13	100	Y
ENFM1987	13	100	Y
ENFM1988	13	100	Y
ENFM1989 (trxB)	13	100	Y
ENFM1990 (ascB)	13	100	Y
ENFM1991	13	100	Y
ENFM1992	13	100	Y
ENFM1993	4	30.8	-
ENFM1994	13	100	Y
ENFM1995	13	100	Y
ENFM1996	13	100	Y
ENFM1997	13	100	Y
ENFM1998	13	100	Y
ENFM1999	13	100	Y
ENFM2000	13	100	Y
ENFM2001	13	100	Y
ENFM2002 (ccpA)	13	100	Y
ENFM2003	13	100	Y
ENFM2004	6	46.2	-
ENFM2005 (tnpB)	6	46.2	-
ENFM2006	6	46.2	-
ENFM2007	13	100	Y
ENFM2008	13	100	Y
ENFM2009 (galU)	13	100	Y
ENFM2010	13	100	Y
ENFM2011	13	100	Y
ENFM2012	13	100	Y
ENFM2013	13	100	Y
ENFM2014	13	100	Y
ENFM2015 (liaX)	13	100	Y
ENFM2016	13	100	Y
ENFM2017	13	100	Y
ENFM2018 (phoU)	13	100	Y
ENFM2019	13	100	Y
ENFM2020 (pstB)	13	100	Y
ENFM2021 (pstA)	13	100	Y
ENFM2022 (pstC)	13	100	Y
ENFM2023	13	100	Y
ENFM2025 (cls)	13	100	Y
ENFM2026	13	100	Y
ENFM2027 (ftsE)	13	100	Y
ENFM2028 (prfB)	13	100	Y
ENFM2029 (secA)	13	100	Y
ENFM2030 (raiA)	13	100	Y
ENFM2031	13	100	Y
ENFM2032	13	100	Y
ENFM2033	13	100	Y
ENFM2034	13	100	Y
ENFM2037	13	100	Y
ENFM2038	13	100	Y
ENFM2039	13	100	Y
ENFM2040	13	100	Y
ENFM2041	13	100	Y
ENFM2042 (yidD)	13	100	Y
ENFM2043	13	100	Y
ENFM2044 (murA)	13	100	Y
ENFM2045	13	100	Y
ENFM2046	13	100	Y
ENFM2047 (atpD)	13	100	Y
ENFM2048	13	100	Y
ENFM2049	13	100	Y
ENFM2050	13	100	Y
ENFM2051 (atpF)	13	100	Y
ENFM2052 (atpE)	13	100	Y
ENFM2053 (atpB)	13	100	Y
ENFM2055 (rnr)	13	100	Y
ENFM2056	13	100	Y
ENFM2057 (secG)	13	100	Y
ENFM2058	13	100	Y
ENFM2059	13	100	Y
ENFM2060	13	100	Y
ENFM2061	13	100	Y
ENFM2062	13	100	Y
ENFM2064 (eno)	13	100	Y
ENFM2065	13	100	Y
ENFM2066	13	100	Y
ENFM2067 (gap)	13	100	Y
ENFM2068	13	100	Y
ENFM2069 (rpoN)	13	100	Y
ENFM2073	13	100	Y
ENFM2074	13	100	Y
ENFM2075	13	100	Y
ENFM2076	13	100	Y
ENFM2077	13	100	Y
ENFM2078	13	100	Y
ENFM2079 (yidA)	13	100	Y
ENFM2080	13	100	Y
ENFM2081	13	100	Y
ENFM2083	12	92.3	Y
ENFM2084	12	92.3	Y
ENFM2085	12	92.3	Y
ENFM2087	13	100	Y
ENFM2088	13	100	Y
ENFM2089	13	100	Y
ENFM2090	13	100	Y
ENFM2091	13	100	Y
ENFM2092	13	100	Y
ENFM2093	13	100	Y
ENFM2094	13	100	Y
ENFM2095	13	100	Y
ENFM2096	13	100	Y
ENFM2097	13	100	Y
ENFM2098	13	100	Y
ENFM2099	13	100	Y
ENFM2100	13	100	Y
ENFM2101 (uvrC)	13	100	Y
ENFM2102 (trxA)	13	100	Y
ENFM2103	13	100	Y
ENFM2104	13	100	Y
ENFM2105 (zapA)	13	100	Y
ENFM2106	13	100	Y
ENFM2107	13	100	Y
ENFM2109	13	100	Y
ENFM2110	13	100	Y
ENFM2111	13	100	Y
ENFM2112	13	100	Y
ENFM2113	13	100	Y
ENFM2114	13	100	Y
ENFM2115	13	100	Y
ENFM2116	13	100	Y
ENFM2117	13	100	Y
ENFM2119	13	100	Y
ENFM2120	13	100	Y
ENFM2121	13	100	Y
[truncated: 602 more rows]
